# Supplementary material
Source: PubMed Central journal article supplement (PMC5570645)

## Embryonic Capillary Endothelial Cells

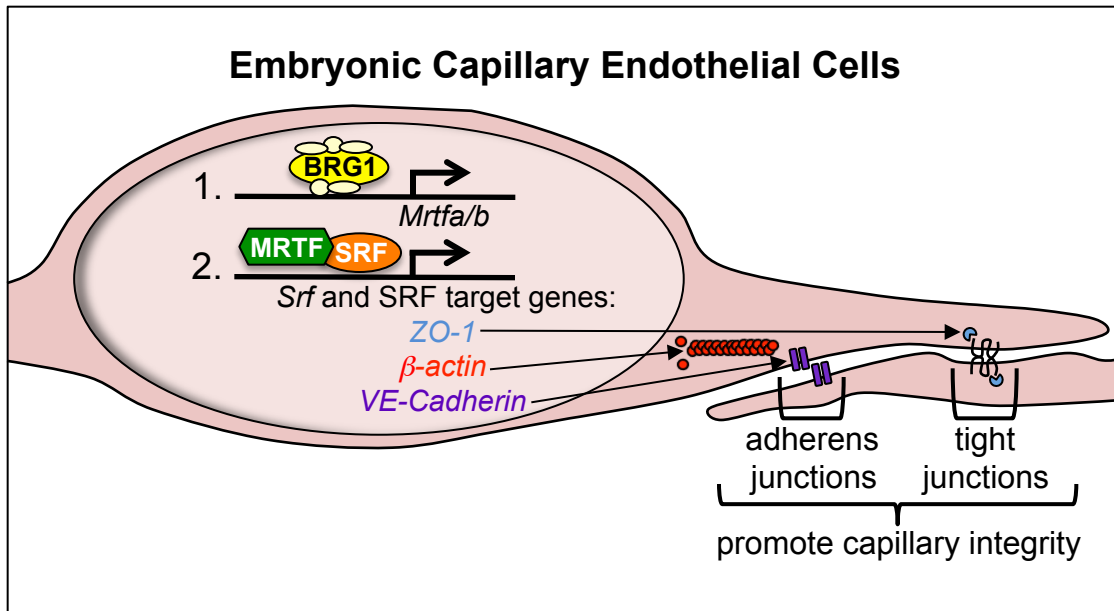

Supplement: NIHMS892294-supplement-Graphical_Abstract.pdf [file NIHMS892294-supplement-Graphical_Abstract.pdf]
